# Supplementary material for: Reversible oxidative dimerization of 4-thiouridines in tRNA isolates
Source: Royal Society of Chemistry journal article supplement (doi:10.1039/d3cb00221g), 2024-01-01
Supplement: d3cb00221g1.pdf [file d3cb00221g1.pdf]

## Reversible oxidative dimerization of 4-thiouridines in tRNA isolates

Larissa Bessler,<sup>a</sup> Jonathan Groß<sup>b</sup>, Christopher J. Kampf<sup>b</sup>, Till Opatz<sup>b</sup> and Mark Helm<sup>\*a</sup>

<sup>a</sup> Institute of Pharmaceutical and Biomedical Sciences, Johannes Gutenberg University Mainz, Staudingerweg 5, 55128 Mainz, Germany.  
E-mail: mhelm@uni-mainz.de

<sup>b</sup> Department of Chemistry, Johannes Gutenberg University Mainz, Duesbergweg 10–14, 55128 Mainz, Germany.

### Supplementary Figures

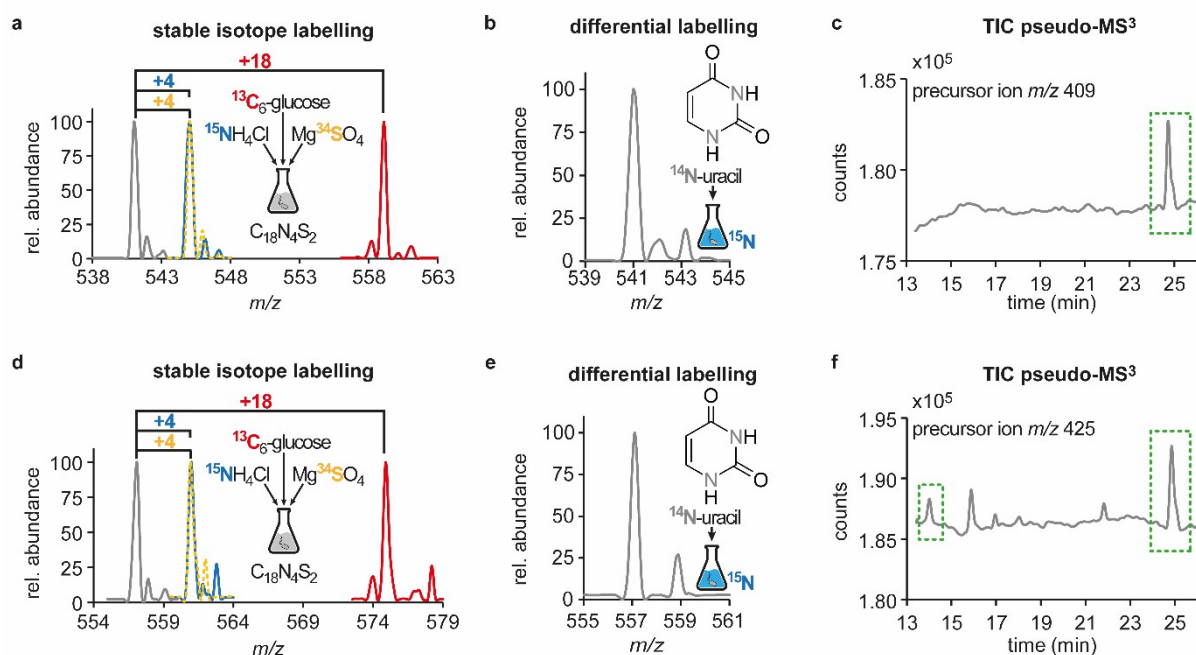

**Supplemental Figure S1:** Abundances were set in relation to the highest peak in the mass spectrum (relative abundance). **a)** Overlay of QQQ mass spectra at 14.6 min corresponding to the early peak of candidate 541, recorded from an NLS of a hydrolysate of unlabelled (grey) or labelled (<sup>13</sup>C = red, <sup>15</sup>N = blue, <sup>34</sup>S = yellow) *E. coli* tRNA. **b)** QQQ NLS mass spectrum for the peak at 14.6 min, recorded from hydrolysed *E. coli* tRNA isolated from a <sup>15</sup>N-labelled culture that was supplemented with <sup>14</sup>N-uridine and displayed for candidate 541. **c)** Total ion chromatogram (TIC) obtained from the product ion scan for the precursor ion with *m/z* 409, resulting from in-source fragmentation of candidate 541. For this analysis, a sample of hydrolysed *E. coli* tRNA, enriched for candidate 541 (collection of a fraction in the time frame of the early peak) was used. The dotted frame in green highlights the signal corresponding to candidate 541. **d)** Overlay of QQQ mass spectra at 14.6 min corresponding to the early peak of candidate 557, recorded and displayed as described in a). **e)** QQQ NLS mass spectrum for the peak at 14.6 min for the sample described in b), displayed for candidate 557. **f)** TIC obtained from the product ion scan for the precursor ion with *m/z* 425, resulting from in-source fragmentation of candidate 557. A sample of hydrolysed *E. coli* tRNA, enriched for candidate 557 (collection of a fraction in the time frame of the early peak) was used. The dotted frame in green highlights the signals corresponding to candidate 557.

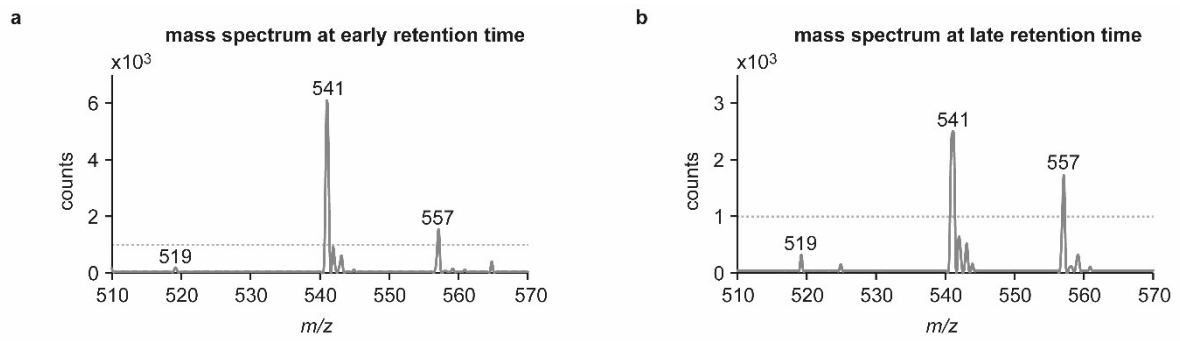

**Supplemental Figure S2:** QQQ NLS mass spectra of the candidate at the early retention time 14.6 min (a) and the late retention time 25.7 min (b), recorded from an NLS of unlabelled *E. coli* tRNA hydrolysate. The dashed line marks the threshold of 10<sup>3</sup> which was used as a filter criterion during generation of the dataset of potentially new ribonucleosides.

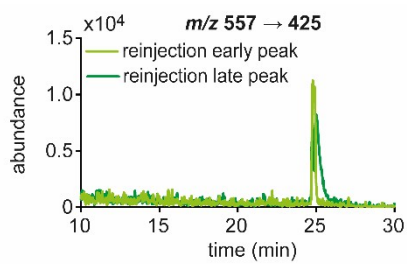

**Supplemental Figure S3:** Merged extracted ion chromatograms ( $m/z$  557 → 425) for reinjection of the separately collected early (light green) and the late (dark green) peak.

# NMR Spectra

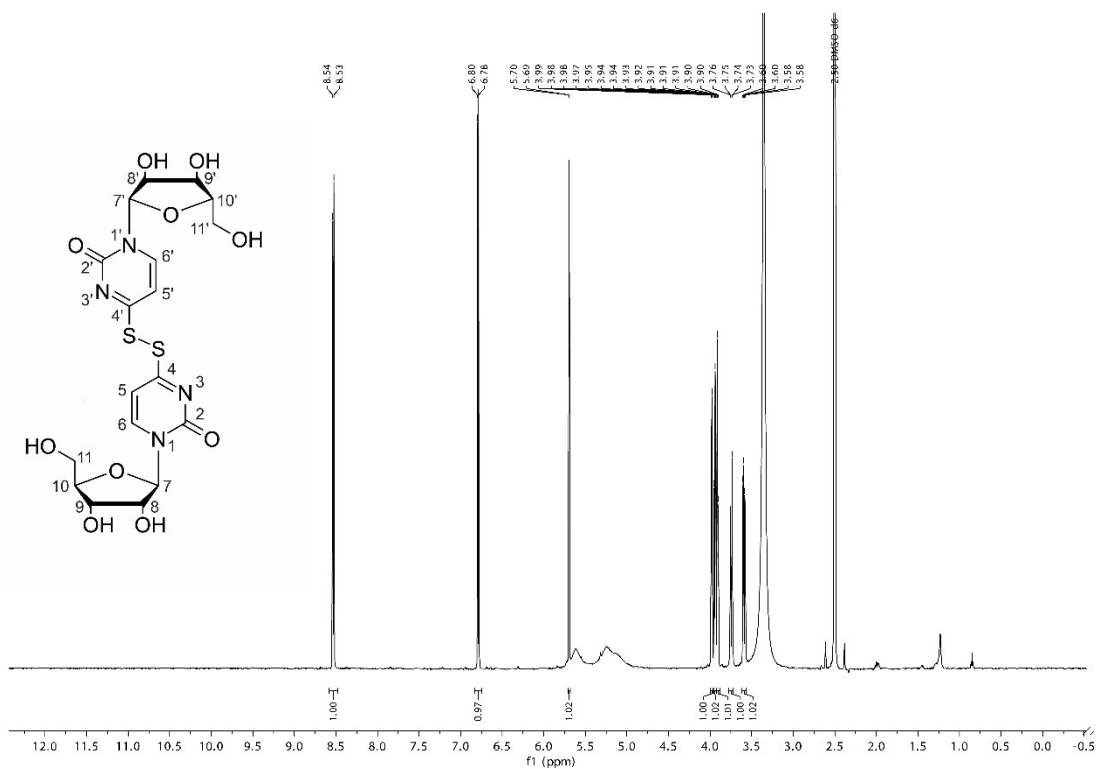

<sup>1</sup>H-NMR spectrum of the s<sup>4</sup>U dimer (600 MHz, DMSO-d<sub>6</sub>).

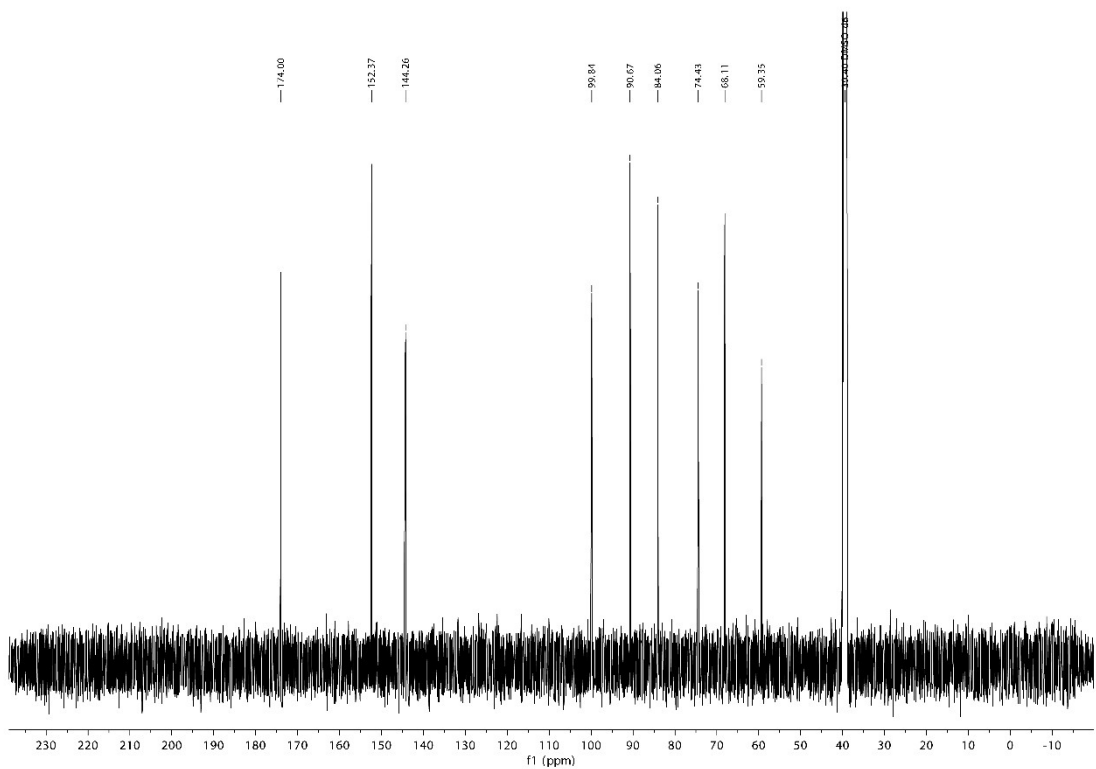

<sup>13</sup>C-NMR spectrum of the s<sup>4</sup>U dimer (151 MHz, DMSO-d<sub>6</sub>).
